# Supplementary material
Source: Springer Nature journal article supplement (https://www.springermedizin.de/resource/supplementary/12875_2013_1073_MOESM1_ESM.pdf/9436052)
Supplement: MOESM1 [file 9436052]

# Screening

-HbA1c  
-ADDQoL  
-SF-36v2  
-CGM\*

-HbA1c  
-ADDQoL  
-SF-36v2  
-CGM\*

-HbA1c  
-ADDQoL  
-SF-36v2  
-CGM\*

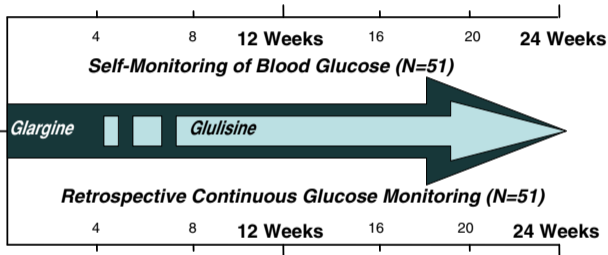

-HbA1c  
-ADDQoL  
-SF-36v2  
-CGM

-HbA1c  
-ADDQoL  
-SF-36v2  
-CGM  
-Utility Questionnaire
